# Supplementary material
Source: PubMed Central journal article supplement (PMC8732315)
Supplement: NIHMS1765678-supplement-1.pdf [file NIHMS1765678-supplement-1.pdf]

## Supplemental information

### Supplemental Figure legends

#### Figure S1

(A) Summary of TFs identified through mass spectrometry of nuclear proteins isolated with a Biotin-Pck1p pulldown from Vehicle (V), Dexamethasone/cAMP (6hrs, D/C) and D/C (6hrs) plus insulin (last 30min, D/C/I) treated primary hepatocytes.

(B) Quantification of TOX4 protein from mass spectrometry of Pck1p pulldown samples under V, D/C and D/C/I treatment.

(C) Tox4 mRNA expression in WT primary hepatocytes treated with different combination of hormones. mRNA levels in each sample were determined by qPCR analysis (n=3).

(D) Tox4 mRNA levels in liver samples from WT 8-week(wk)-old male killed in ad lib (n=5), 16hr-fasting (n=7) and 16hr-fasting followed 4hr-refeeding (n=4) conditions. (ns= not significant).

(E) TOX4 protein in different tissues from 10-wk-old male mice.

\*  $p < 0.05$ , \*\*  $p < 0.01$ , \*\*\*\*  $p < 0.0001$  by One-way ANOVA analysis. ns: not significant. Data are presented as means  $\pm$  SEM.

#### Figure S2

(A) WB of *Ctrl sh-* or *Tox4 sh-* treated WT primary hepatocytes lysates.

(B) SiRNA-mediated silencing of *Tox4* in WT primary hepatocytes as determined by qPCR. Primary hepatocytes were transfected with control (*Ctrl*) siRNA or *Tox4* siRNA for 72 hrs (n=12). \*\*\*\*  $p < 0.0001$ , 2-tailed student's t-test.

(C-D) *Pck1* (C) and *G6pc* (D) mRNA levels determined by qPCR in *Ctrl* or *Tox4* siRNA-treated primary hepatocytes after incubation with V, D/C for 6hrs, D/C for 6 hrs then 100nM insulin for the last 2hrs (D/C/I 2hrs), or D/C/I for 6hrs (n=3).

(E) WB of TOX4, FoxO1, and ACTIN in Ad-GFP and Ad-Flag-TOX4-treated primary hepatocytes.

(F) Glucose production in primary hepatocytes under the same conditions indicated in D.

(G-H) PTT and GTT in 10-wk-old mice after Ad-GFP or Ad-TOX4 injection on Day 6 and Day 12 (n=7,8).

(I) WB of TOX4, FoxO1 in livers of Ad-GFP- and Ad-TOX4-treated mice.

\**a*  $p < 0.05$ , \*\**aa*  $p < 0.01$ , \*\*\**aaa*  $p < 0.001$ , \*\*\*\*  $p < 0.0001$ . 2-tailed student's t-test in B, G, H and 2-way ANOVA in C,D,F. Asterisks indicate comparison within group. *a* indicates comparison with *Ctrl* siRNA or Ad-GFP group. Data are presented as means  $\pm$  SEM.

### Figure S3

10-wk-old C57BL/6J mice were injected with adenovirus *Ctrl sh* (n=7) or *Tox4 sh* (n=8) and sacrificed after 2 wks post injection.

(A) Expression of *Tox* isoforms in Liver (n=6,7).

(B) Body weight (BW).

(C) Liver weight, normalized to BW.

(D) Plasma insulin levels at indicated (n=6-8 for each group);

(E-H) Plasma triglyceride (TG) (E); non-esterified fatty acids (NEFAs) (F), total cholesterol (G) and Alanine Amino-transferase (ALT, H) determined by colorimetric assays (n=7 for each group).

(I) Expression of lipogenic and lipolysis genes in EWAT of 4-hr fasted mice.

(J) *Gckp*-luciferase assays of TOX4, HNF4 $\alpha$  and their combinations.

(K) PAS staining of liver sections from 16-hr fasted mice. Scale bar, 200 $\mu$ m.

(L) Glycogen content in livers from 16-hr fasted and 4-hr refeed mice.

\*  $p < 0.05$ , \*\*  $p < 0.01$ , \*\*\*  $p < 0.001$ , compared with *Ctrl sh* group by 2-tailed student's t-test. Data are presented as means  $\pm$  SEM.

#### Figure S4

(A) Heatmap of expression clustering of differentially expressed genes in *Tox4 sh*-treated liver vs *Ctrl sh*-treated liver.

(B-C) Functional enrichment of differentially expressed genes in A. Top 20 enriched biological processes (BP) of up-regulated (B) and down-regulated (C) genes.

(D) List of up-regulated genes enriched in BPs (GO Term) associated with glucose metabolism.

(E) Liver *Gcgr* mRNA level in *Ctrl sh*- or *Tox4 sh*-treated mice.

\*  $p < 0.5$  by 2-tailed student's t-test. Data are presented as means  $\pm$  SEM.

#### Figure S5

(A) Diagram of breeding strategy to generate TOX4 LKO mice.

(B) Genotyping results of *Tox4 loxP* (f) and Albumin-Cre alleles.

(C) *Tox2*, *Tox3*, *Tox4* expression in TOX4 *f/f* (n=5) and TOX4 LKO (n=6) mouse liver.

(D) WB of PCK1 and G6PC in TOX4 *f/f* and LKO primary hepatocytes.

(E) Body weight of 12-wk-old male TOX4 *f/f* and LKO mice fed with chow diet (CD, n=11,9) or high fat diet for 4 weeks (HFD, n=8,8). Mice were weighed after a 16-hr fast.

(F) Fasting glucose (16-hr fast) in mice from (E).

(G) Plasma insulin level in TOX4 *f/f* and LKO mice on CD (4-hr fast, n=6,8) or HFD (6-wk HFD, 4-hr fast, n=6,8).

(H) Insulin tolerance test (ITT) of TOX4 *f/f* and LKO mice under HFD (n=5,6).

(I-J) mRNA levels of glucose metabolic genes in TOX4 *f/f* and LKO mice fed with CD (16-hr fasting, n=8,6) (I) or HFD mice (4-hr fasting, n=7,8)(J).

\*\*  $p < 0.01$ , \*\*\*  $p < 0.001$ , 2-tailed student's t-test. Data are presented as means  $\pm$  SEM.

#### Figure S6

17-wk-old male *FoxO1 f/f* (n=8), TOX4 LKO (TLKO, n=6), *FoxO1* LKO (O1LKO, n=7) and TOX4/*FoxO1* double LKO (DKO, n=6)

(A) Body weight (BW).

(B) Fasting glucose (F16h).

(C) Plasma insulin after 16-hr fasting.

(D) Liver weight (normalized to BW).

(E-F) Liver glycogen content (E) and PAS staining of liver sections (F) after 4-hr fasting. Scale bar, 200 $\mu$ m.

(G) WB of RFP- or Flag-TOX4-transfected AML12 cells after 30min treatment with either 0.1mM cAMP or 100nM Insulin.

\*\*  $p < 0.01$ , \*\*\*  $p < 0.001$  by One-way ANOVA analysis. No significant differences were observed among the three genotypes in A-C and F. Data are presented as means  $\pm$  SEM.

### Figure S7

(A-B) QPCR (A) and WB (B) of livers from 14- to 15-week-old *f/f* (n=9), LIRKO (n=9) and LIRTDKO (n=5) mice. \* $p < 0.05$ , \*\*\*\*  $p < 0.0001$ , 2-way ANOVA.

(C-D) Body weight (C, 16-hr fast) and PTT (D) of 12-wk-old IR *f/f* (n=4) and LIRKO (n=6) male mice fed with chow diet.

(E) Liver histology, HE and PAS staining. Scale bar, 200  $\mu$ m.

\*  $p < 0.05$ , \*\*  $p < 0.01$ , by 2-tailed student's t-test, as compared with *f/f* mice. Data are presented as means  $\pm$  SEM.

### Figure S8

TOX4 locus shows strong genetic association with glycemic traits. Colored bars summarize bottom-line meta-analyzed associations for phenotypes in the glycemic trait group. P-value for each phenotype indicated in the bracket. Phenotypes directly associated with TOX4 gene are marked by red check marks (Type 2 Diabetes Knowledge Portal).

### Figure S9

(A) Body weight of mice after 1 month of HFD at day 6 and day 10 post adenovirus injection.

(B) Liver weight of *Ctrl sh-* and *Tox4 sh-* treated HFD mice at Day12 post adenovirus administration.

(C-H) Plasma insulin (C), TG (D), cholesterol (E), NEFA (F), ALT (G) and liver glycogen (H, n=7,7) from *Ctrl sh-* and *Tox4 sh-* treated HFD mice determined by ELISA or colorimetric assays.

(I) Liver mRNA expression of glucose metabolic genes as indicated in *Ctrl sh-* or *Tox4 sh-* treated mice (n=9,10).

\*  $p < 0.05$  by 2-tailed Student's t-test. Data are presented as means  $\pm$  SEM.

### Figure S10

(A) *Tox4* mRNA in muscle from *Ctrl sh-* and *Tox4 sh-* treated *db/db* mice (n=8,8).

(B) Body weight (BW) of 12-wk-old male *db/db* mice before (Day 0) and after adenovirus treatment (Day 10).

(C) Liver weight of *Ctrl sh-* and *Tox4 sh-* treated *db/db* mice. Liver weight was normalized to BW.

(D) Plasma insulin in *Ctrl sh-* and *Tox4 sh-* treated *db/db* mice after a 4-hr fast.

(E) Plasma TG in *Ctrl sh-* and *Tox4 sh-* treated *db/db* mice after a 4-hr fast.

(F) Plasma NEFA in *Ctrl sh-* and *Tox4 sh-* treated *db/db* mice after a 4-hr fast.

(G) Plasma ALT levels in *Ctrl sh-* and *Tox4 sh-* treated *db/db* mice after a 4-hr fast.

(H) Liver glycogen content.

\*  $p < 0.05$  by 2-tailed student's t-test. Data are presented as means  $\pm$  SEM.

**A**

| TFs     | Σ# PSMs | Negative control | V         | D/C        | D/C/I     |
|---------|---------|------------------|-----------|------------|-----------|
| TOX4    | 4       | 0                | 4527041.7 | 4282688.77 | 0         |
| HMGA1   | 5       | 0                | 14835013  | 24341980   | 0         |
| NFIC    | 7       | 0                | 31151610  | 40653993.7 | 6478798.1 |
| NFIX    | 8       | 0                | 51391508  | 45622390.1 | 13666289  |
| NFIA    | 10      | 0                | 31151610  | 39953339.7 | 15396101  |
| NFIB    | 8       | 0                | 28291065  | 38657421.5 | 17766508  |
| NFIL3   | 22      | 0                | 28553090  | 41551205.5 | 31609071  |
| YBX1    | 8       | 51470227         | 76836287  | 50852203   | 41831809  |
| TFAM    | 12      | 0                | 118442654 | 50746815.3 | 43474472  |
| UBP1    | 5       | 0                | 7015711.1 | 8391422.63 | 7537677.6 |
| CDC5L   | 20      | 2707361          | 25752706  | 18686856.2 | 25588380  |
| MTA2    | 5       | 2421430          | 4514363   | 4413410.91 | 6235892.6 |
| CEBPA   | 4       | 0                | 4389757.8 | 3748911.77 | 6182215.8 |
| AHCTF1  | 67      | 1719952          | 39543349  | 42571608.3 | 76869056  |
| CEBPB   | 36      | 8030686          | 31684415  | 106483642  | 192592272 |
| SMARCC2 | 5       | 0                | 4044330.9 | 4160207.24 | 10261075  |
| ZBTB20  | 9       | 8983750          | 13644700  | 8982654.31 | 23704815  |
| SMARCA5 | 8       | 2523090          | 11412245  | 2919820.43 | 10514397  |
| ONECUT1 | 4       | 0                | 8380033.6 | 0          | 15673577  |
| PDS5B   | 4       | 0                | 13474771  | 0          | 9937279.2 |

**B**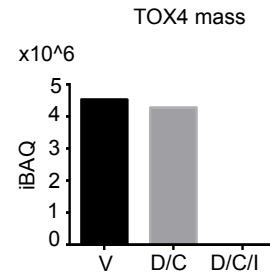**C**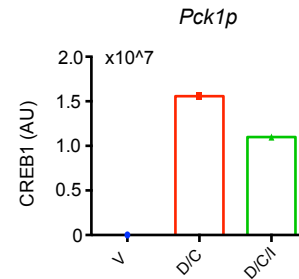**D**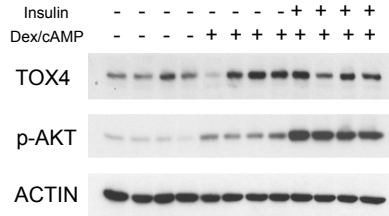**E**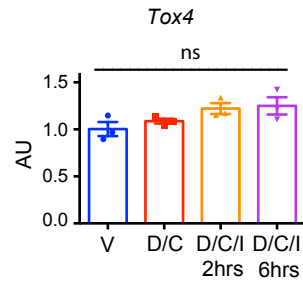**F**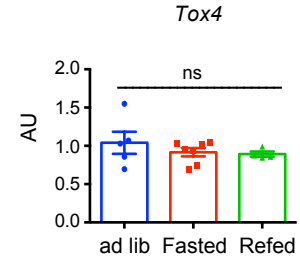**G**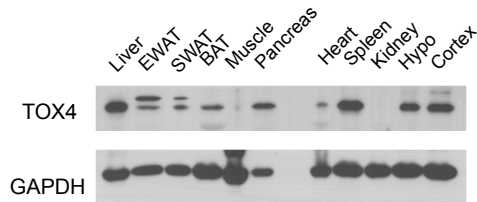**H**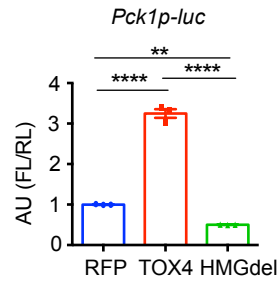**I**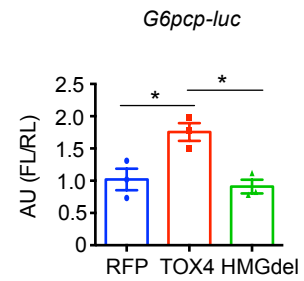

**Figure S1. Identification of TOX4 as an insulin-regulated TF from *Pck1p*-binding proteins. Related to Figure 1.**

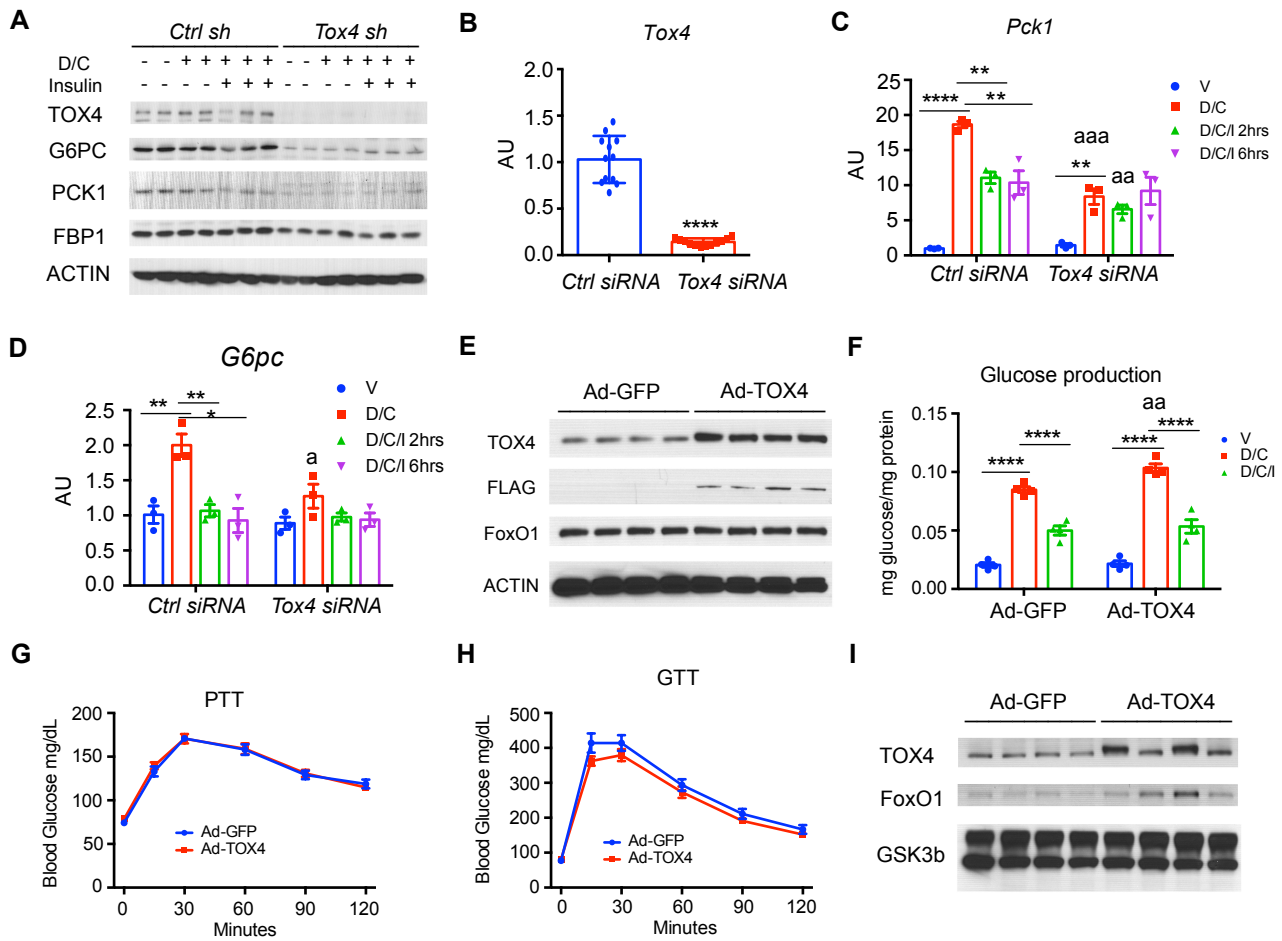

**Figure S2. Silencing *Tox4* in primary hepatocytes decreased gluconeogenesis. Related to Figure 2.**

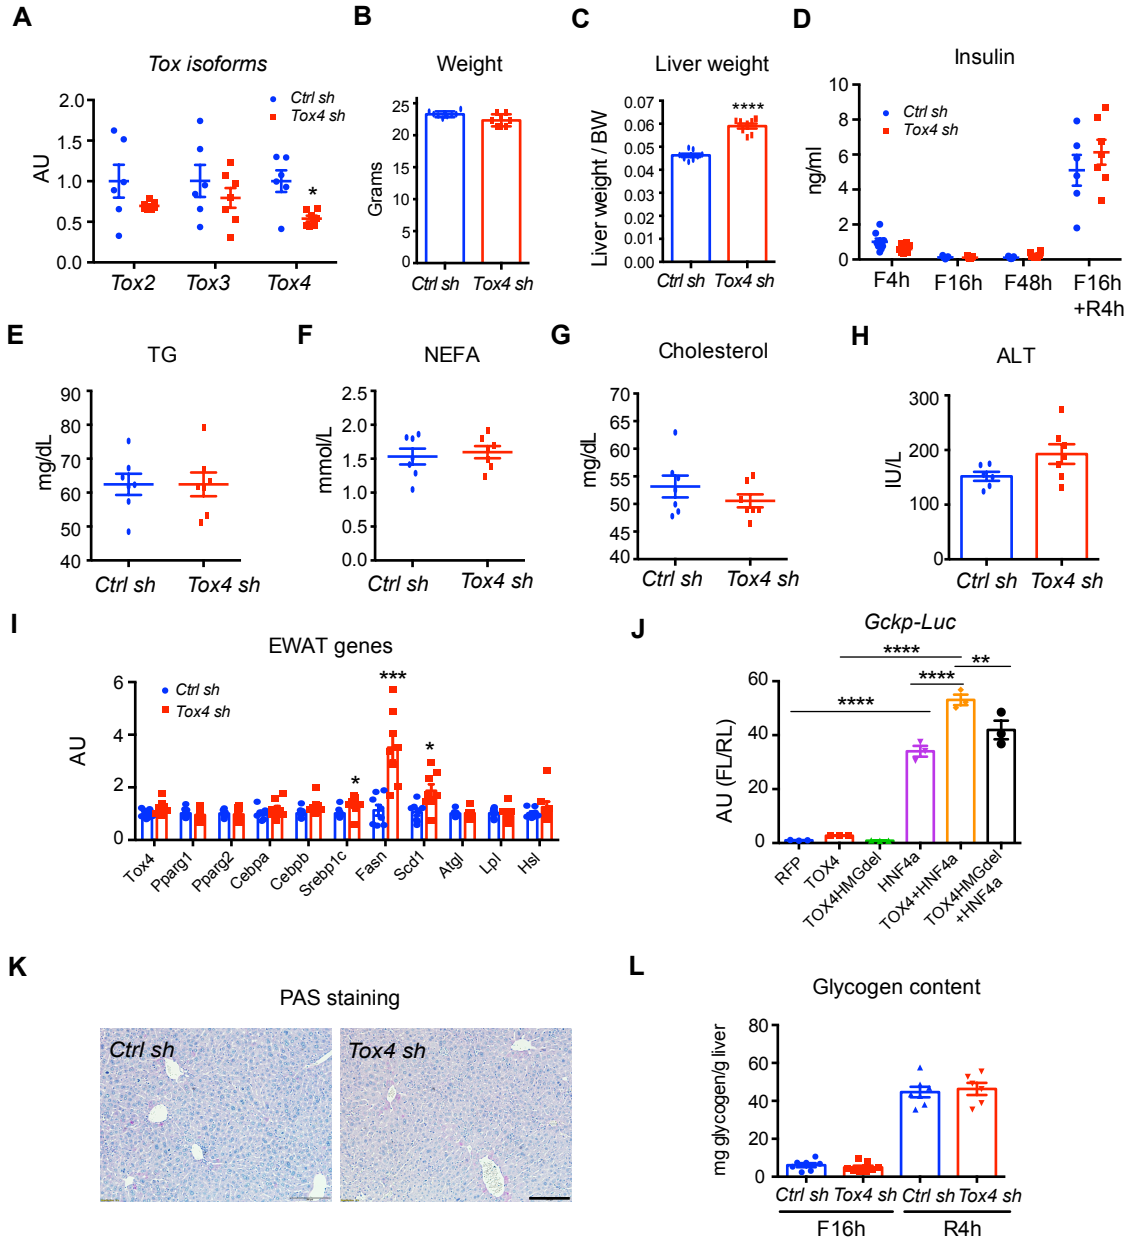

**Figure S3. Metabolic characterization of TOX4 KD mice. Related to Figure 2.**



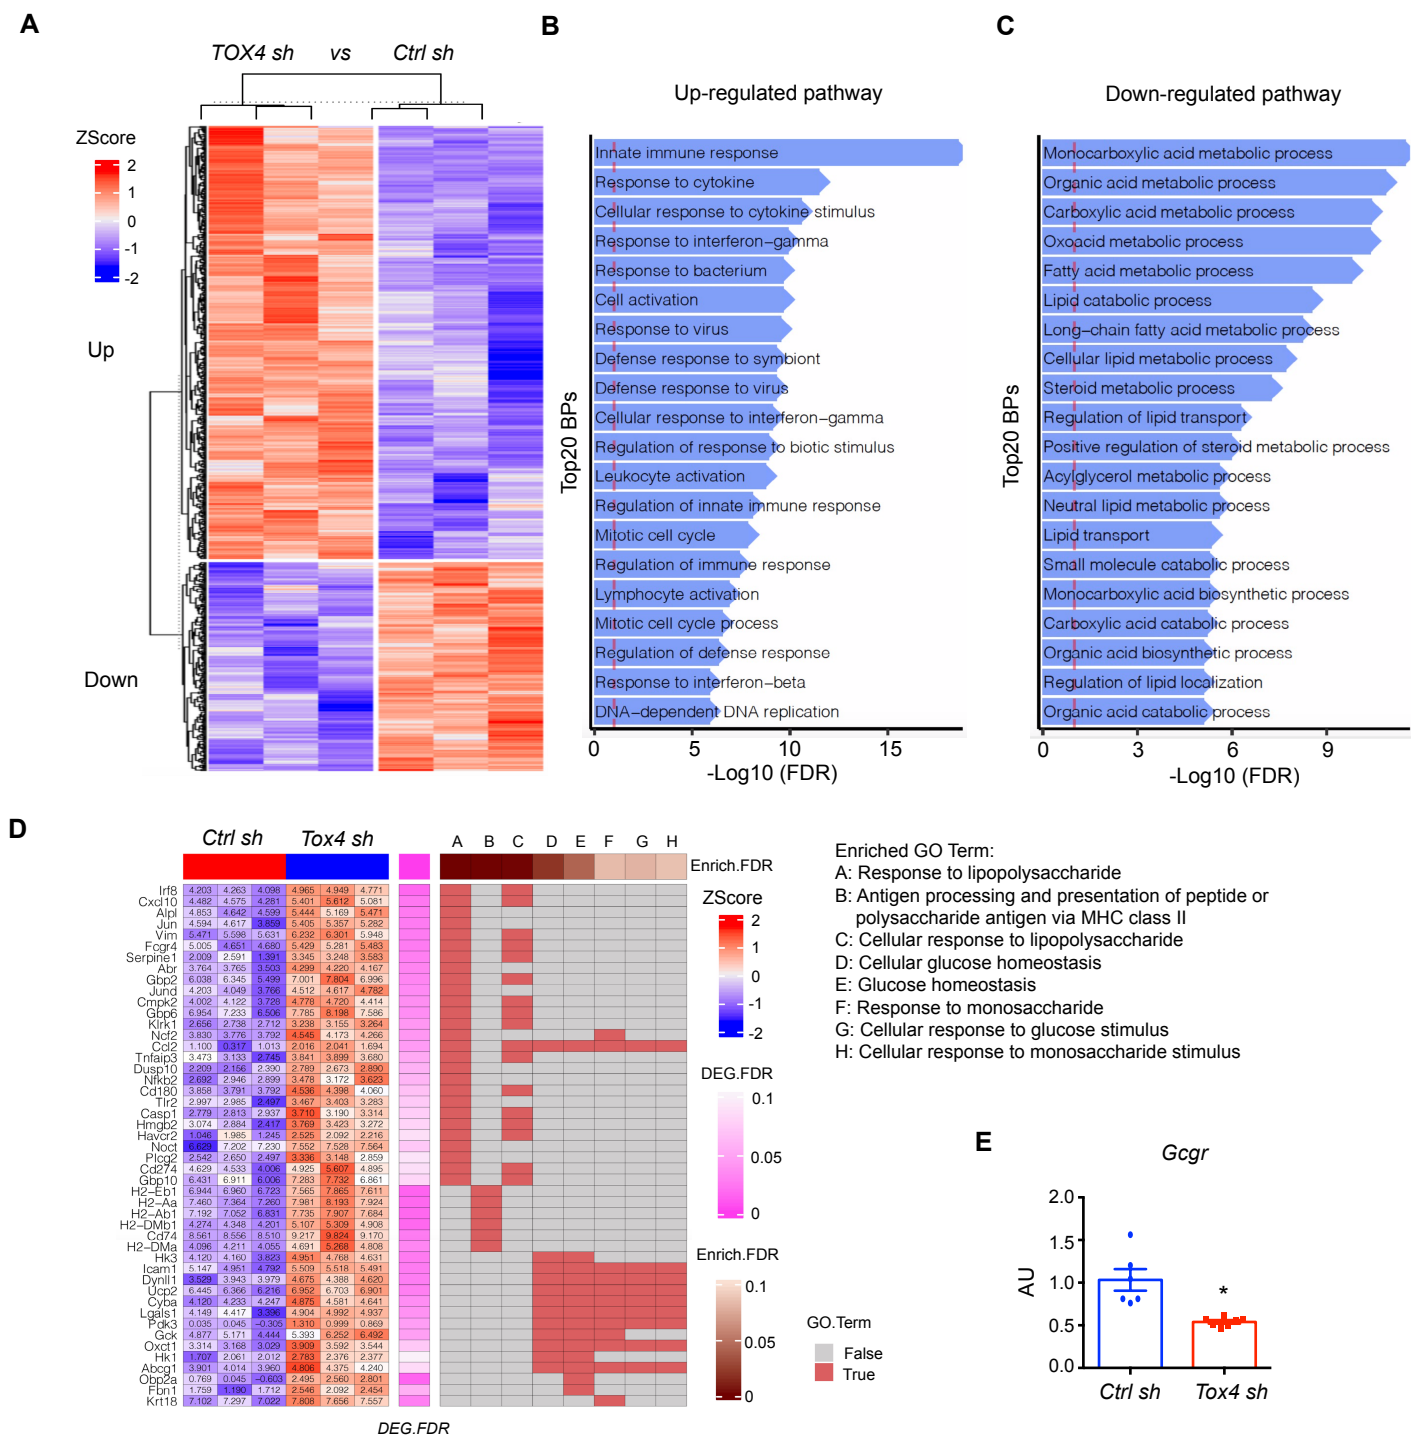

Figure S4. RNA-seq of livers from TOX4 KD mice. Related to Figure 2.

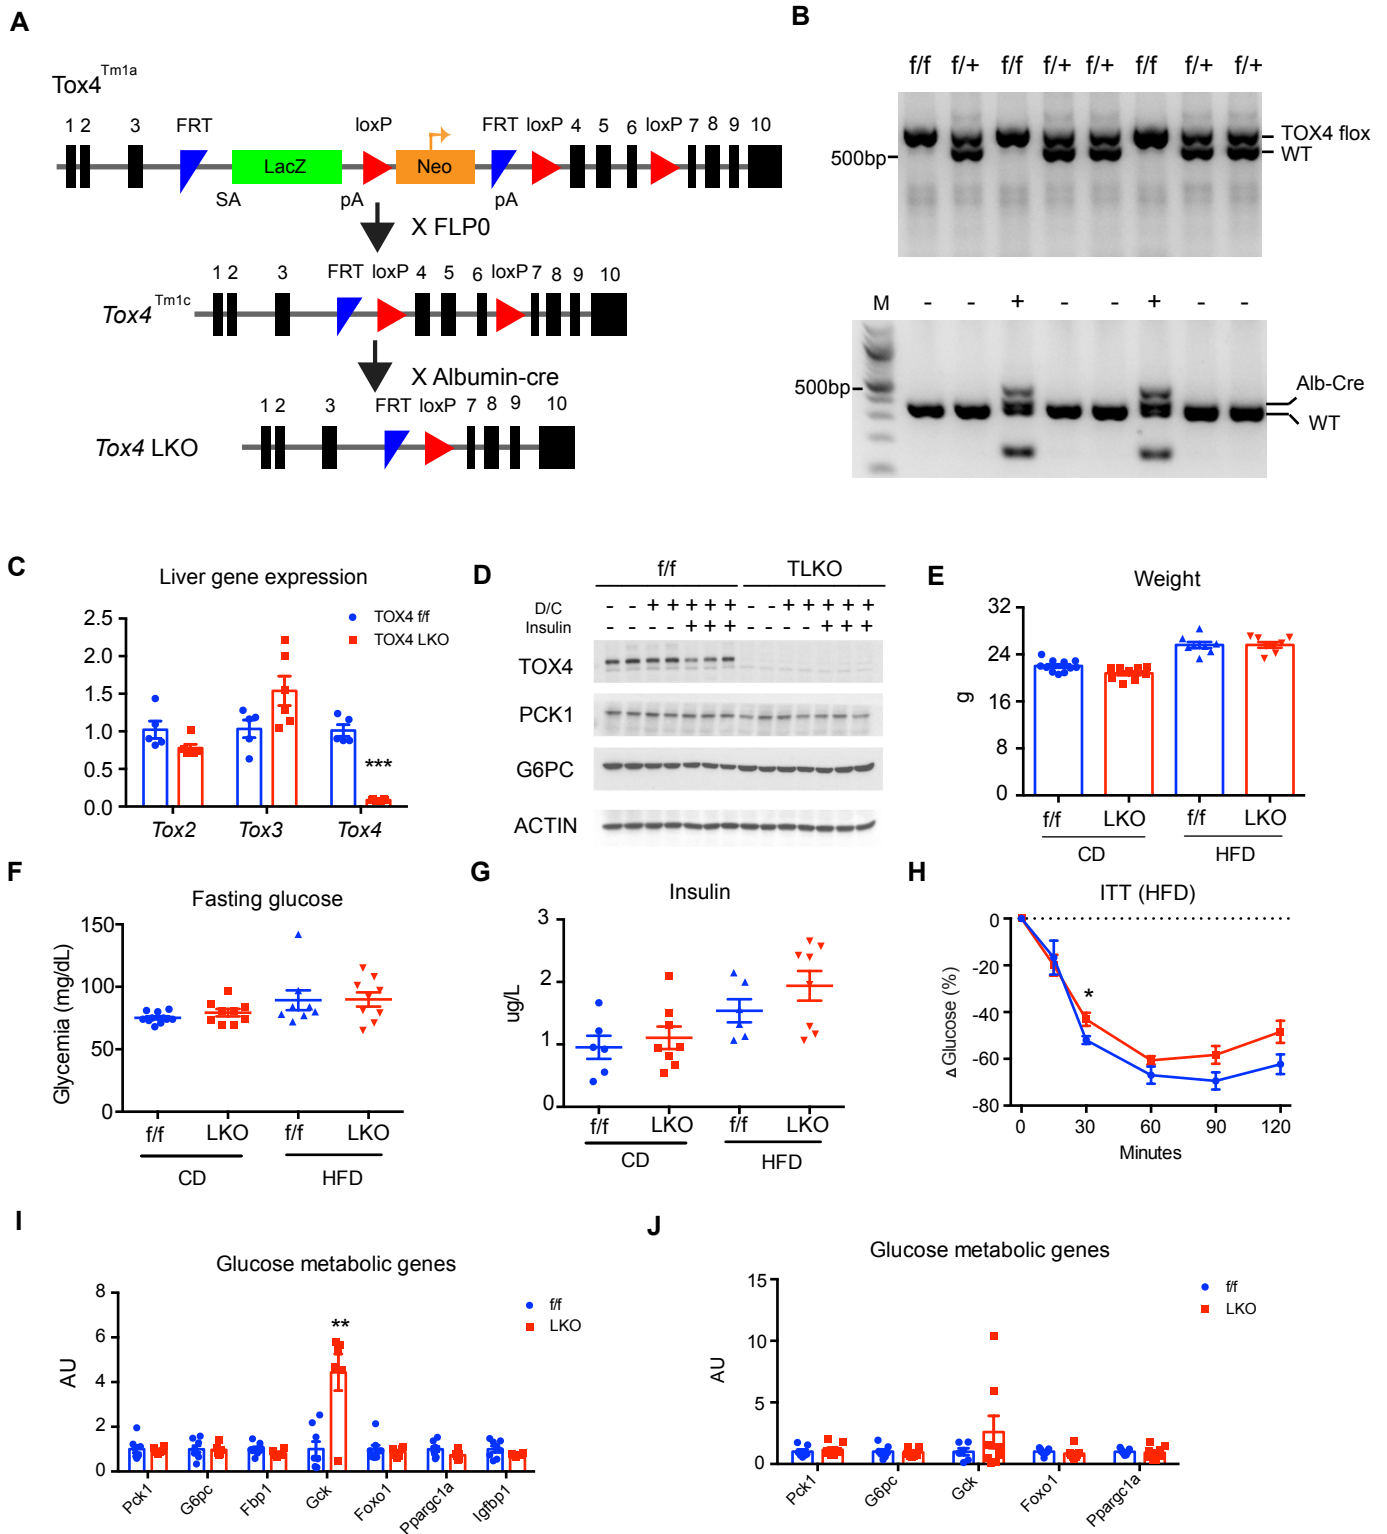

**Figure S5. Generation and metabolic characterization of TOX4 LKO mice. Related to Figure 3.**

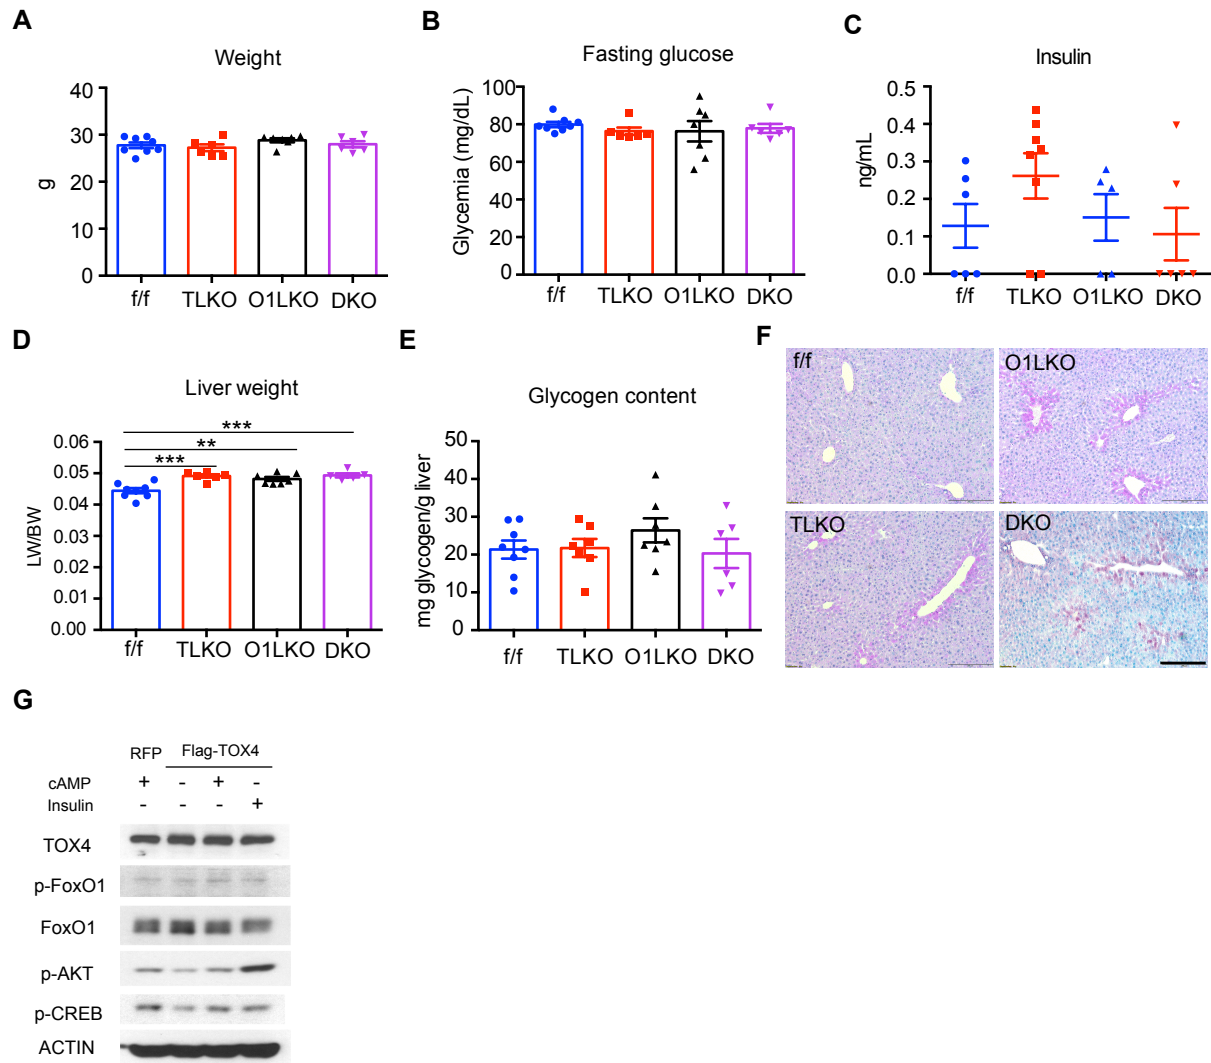

**Figure S6. Metabolic characterization of TOX4/O1 DKO mice. Related to Figure 4.**

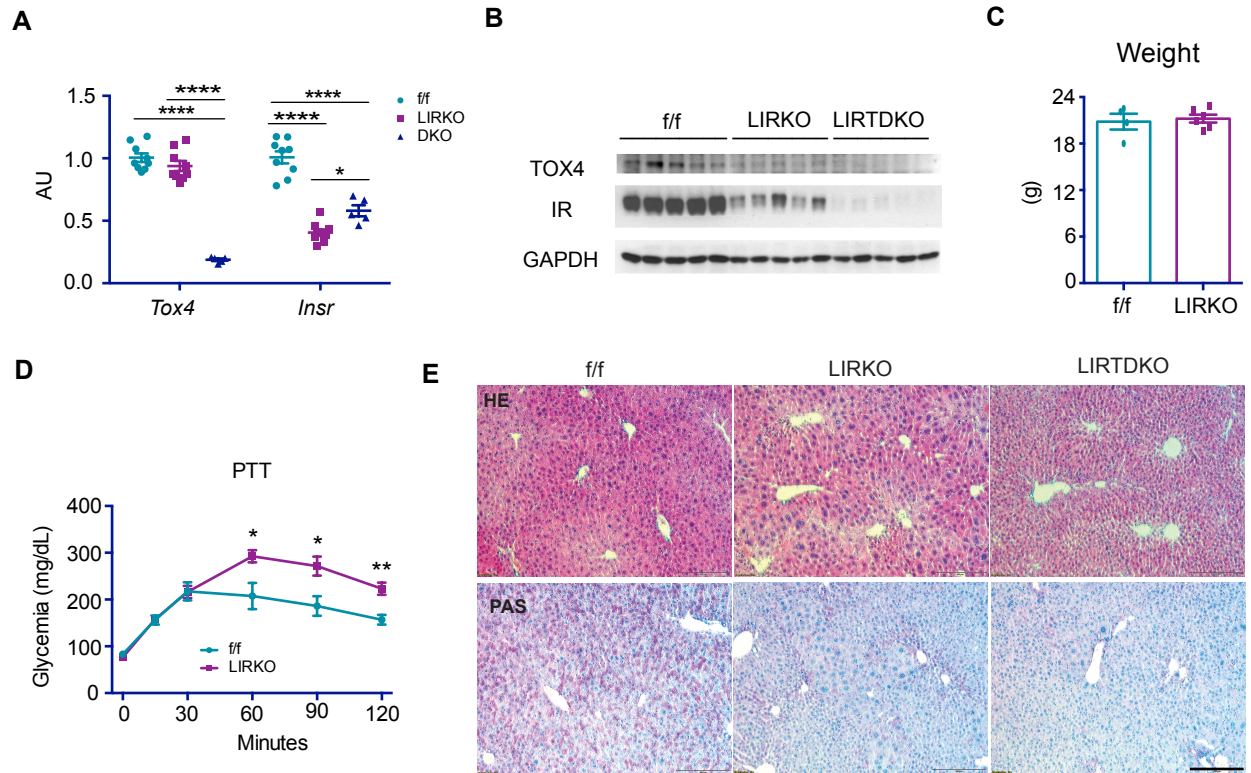

**Figure S7. Metabolic characterization of LIRKO and LIRTDKO mice. Related to Figure 5.**

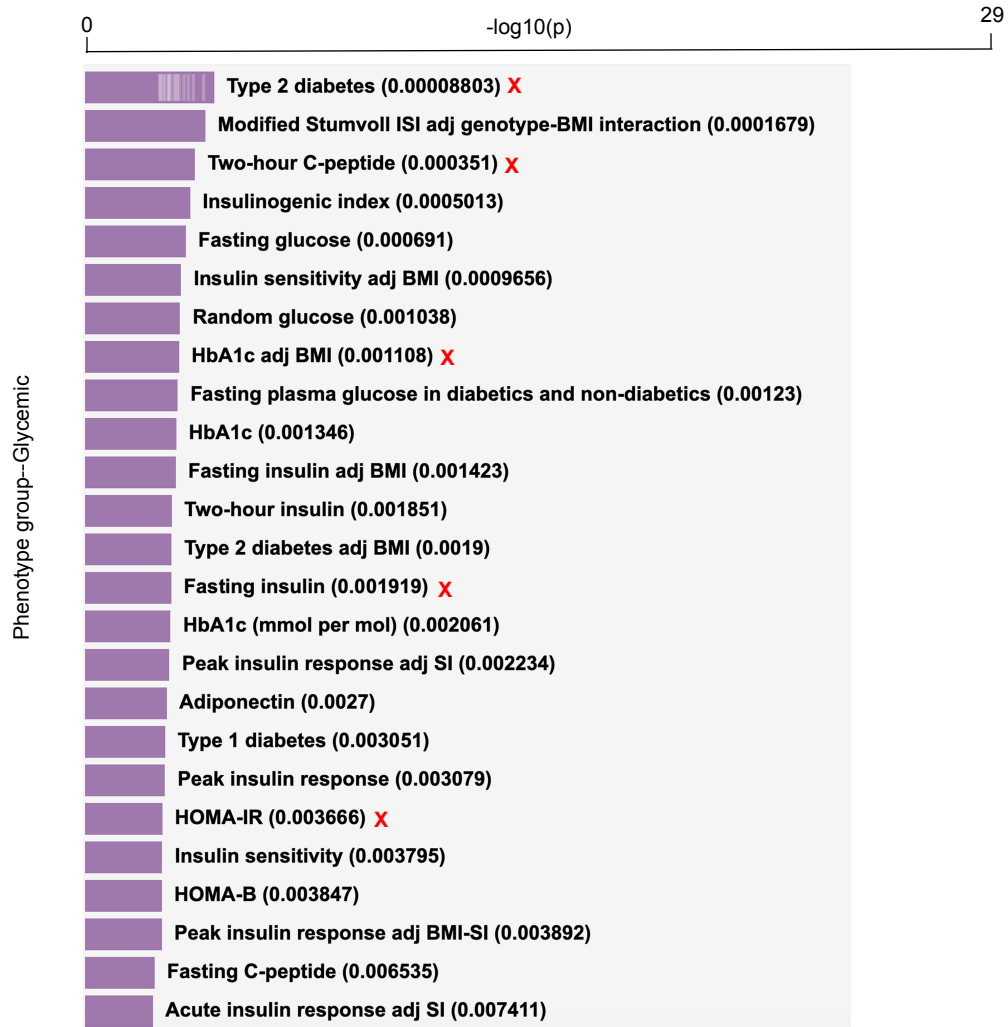

Figure S8. TOX4 locus is associated with glycemic traits in human. Related to Figure 6.

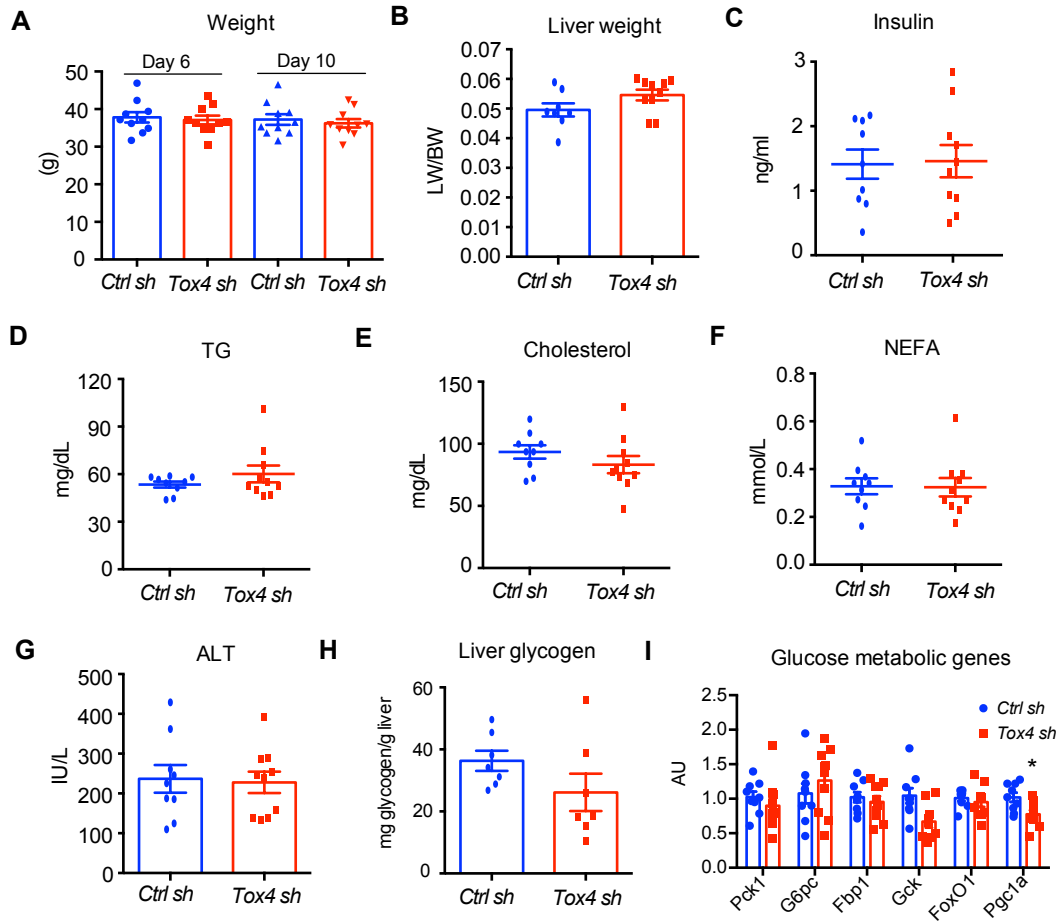

**Figure S9. Metabolic characterization of TOX4 KD DIO mice. Related to Figure 6.**

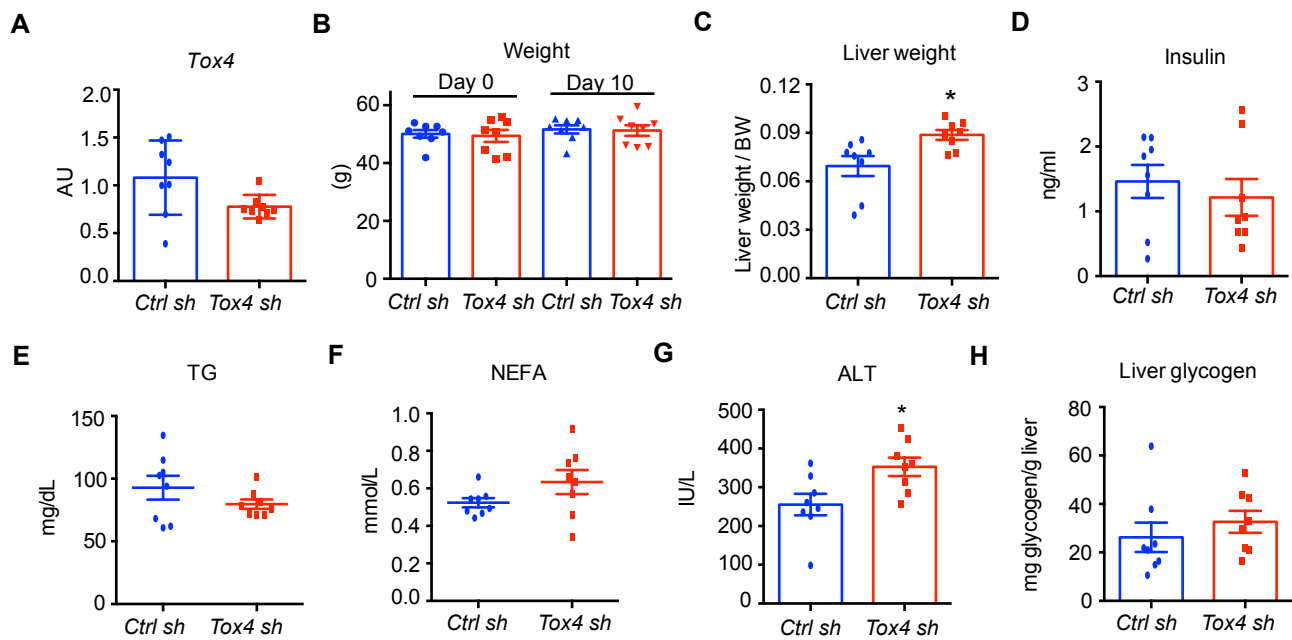

**Figure S10. Metabolic characterization of TOX4 KD db/db mice. Related to Figure 7.**

**Table S1. Information of human subjects included in this study. Related to Figure 6.**

| <b>ID</b> | <b>Age</b> | <b>Gender</b> | <b>T2D/Obese</b> | <b>Liver diagnoses</b> |
|-----------|------------|---------------|------------------|------------------------|
| 1         | 13         | male          | NA               | Normal                 |
| 2         | 10         | male          | NA               | Normal                 |
| 3         | 59         | male          | NA               | Normal                 |
| 4         | 36         | female        | NA               | Normal                 |
| 5         | 50         | male          | NA               | Normal                 |
| 6         | 67         | female        | NA               | Normal                 |
| 7         | 53         | male          | T2D              | fatty liver            |
| 8         | 67         | female        | T2D              | cirrhosis              |
| 9         | 64         | female        | T2D              | fatty liver +HCC*      |
| 10        | 62         | female        | Obese            | fatty liver            |
| 11        | 43         | female        | Obese            | fatty liver            |
| 12        | 57         | female        | T2D              | fatty liver            |

\*HCC: Hepatocellular carcinoma
